# Supplementary material for: Synthesis of Organic-Inorganic Hybrid Material with a Synergistic Interface as a Release Agent for Free Acid β-Hydroxy-β-Methyl Butyrate
Source: Hindawi journal article supplement (doi:10.1155/2021/3060539), 2021-12-06
Supplement: f1 [file 3060539.f1.docx]

**S1**

**IR variations of HMB molecule**

*References*: According to Ma et al., and Czarnik-Matusewicz the use of infrared spectroscopy (FTIR) has been previously reported as a reliable and simple tool for the identification of particular species present in a sample [1,2]. To demonstrate the spectral variations induced by the HMB molecule when this is present in the hybrid synthesized materials, we employ the FTIR technique.

*Method*: FTIR spectra were recorded with a Thermo Scientific NICOLET iS5 iD5 ATR model. These spectra were obtained in the range 4000-600 cm-1 and were recorded with accumulation of 16 scans with a spectral resolution of 4cm-1. The diamond was cleaned between each recording with acetone.

For the analysis, 0.150 g of the previously synthesized ZnAl powder was weighed and used as the basis for each experiment. Then, a known amount of HMB (see in Figure S1) was weighed and mixed for 2 h in an agate mortar to achieve homogenization of the HMB molecule and the LDH. Finally, the sample was read, and the results were analyzed.

*Results*: An example of correlation analysis concerned to concentration-dependent spectral changes is discussed in this experiment and shown in Figure S1.The ZnAl LDH spectra (control) were compared with the ZnAl/HMB spectra, leaving the amount of LDH constant and gradually increasing the amount of HMB (Figure S1). The concentration-dependent study shows that the interaction between the crystal surface of LDH and the metabolite -hydroxy--methyl butyrate (HMB) can be monitored successfully by this method, and the interaction is characterized by intensity changes at frequencies assigned at ~ 2973 cm-1 and ~1563 cm-1.


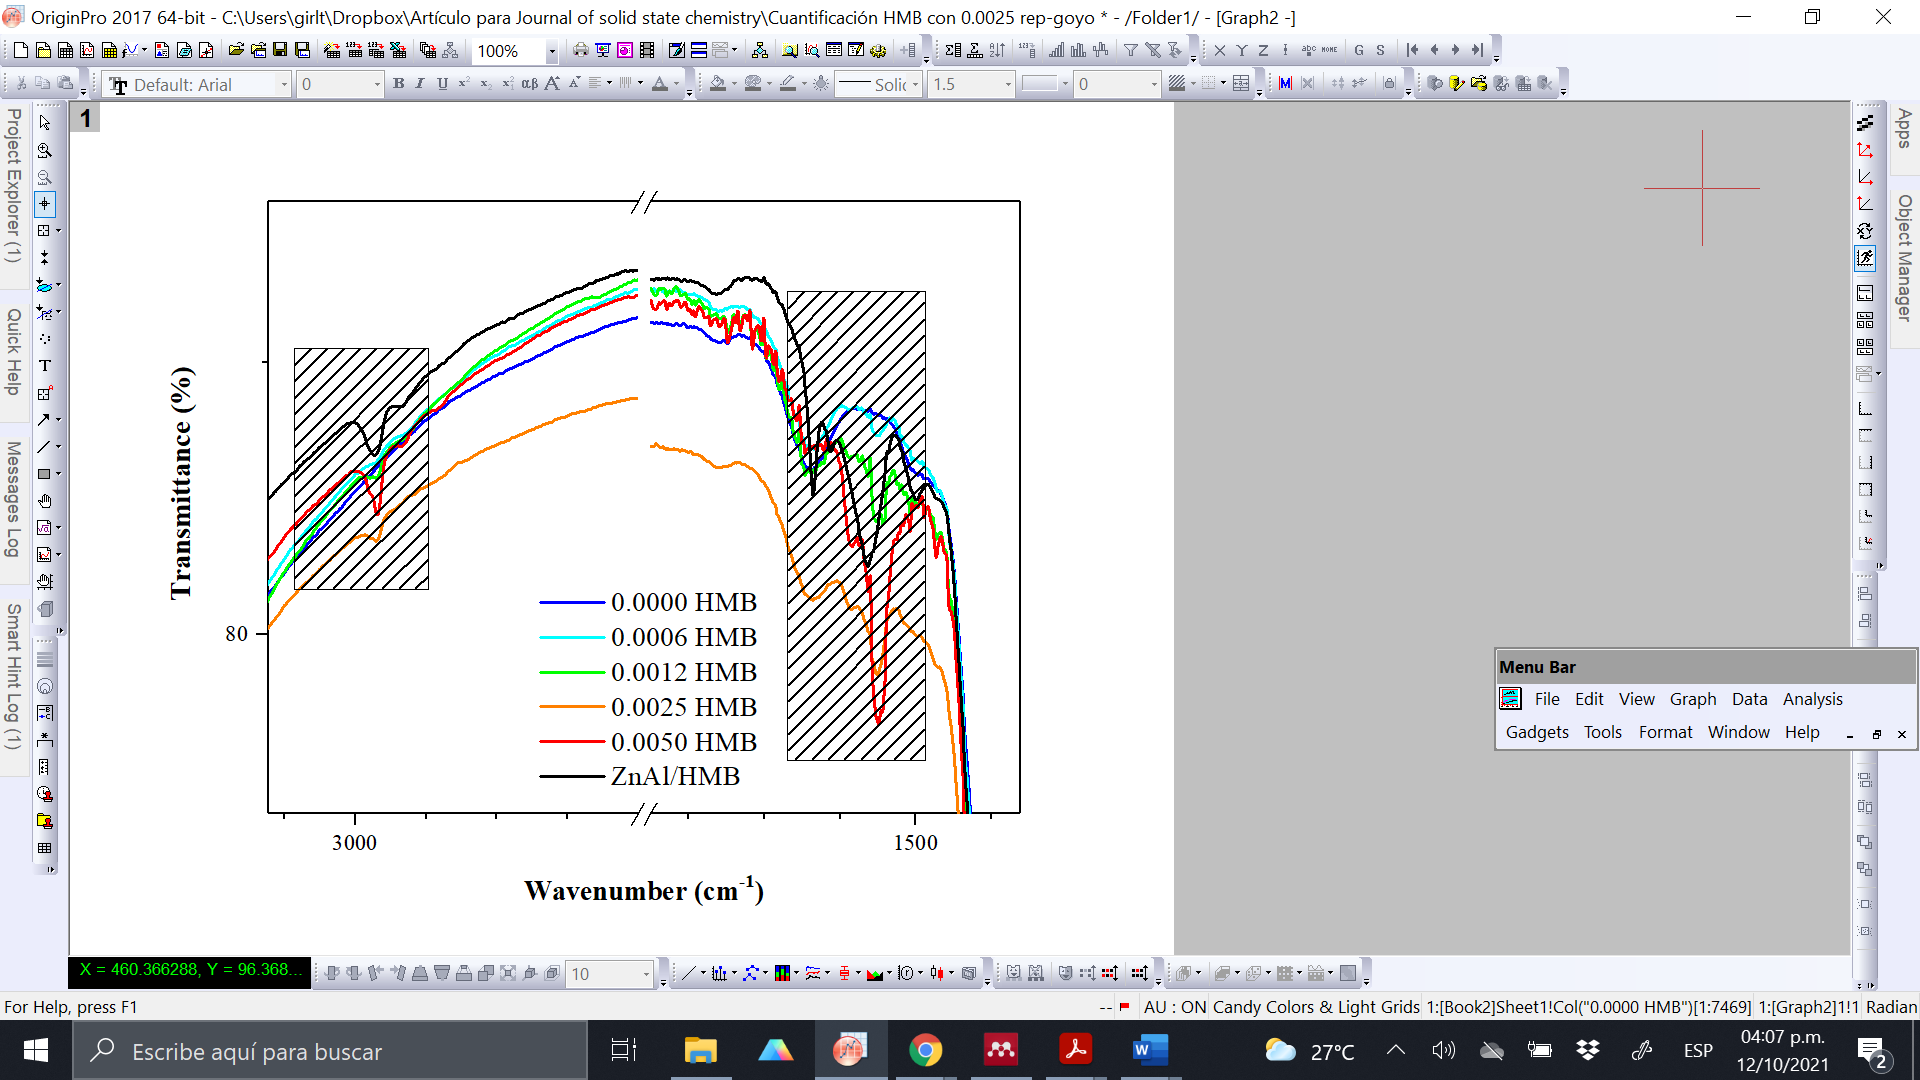
**Figure S1.** Concentration-dependent FTIR spectral variations in the shaded regions after the pretreatments, except for the ZnAl/HMB curve (black), and the ZnAl LDH curve (blue).

**References**

1. Ma, Y.; Rigolet, S.; Michelin, L.; Paillaud, J. Microporous and Mesoporous Materials Facile and fast determination of Si / Al ratio of zeolites using FTIR spectroscopy technique. *Microporous and Mesoporous Materials***2021**, *311*, 110683, doi:10.1016/j.micromeso.2020.110683.

2. Czarnik-Matusewicz, B.; Murayama, K.; Wu, Y.; Ozaki, Y. Two-dimensional attenuated total reflection/infrared correlation spectroscopy of adsorption-induced and concentration-dependent spectral variations of β-lactoglobulin in aqueous solutions. *Journal of Physical Chemistry B***2000**, *104*, 7803–7811, doi:10.1021/jp0008039.
