# Supplementary figures and images for: Synthesis of Organic-Inorganic Hybrid Material with a Synergistic Interface as a Release Agent for Free Acid β-Hydroxy-β-Methyl Butyrate
Source: Hindawi journal article supplement (doi:10.1155/2021/3060539), 2021-12-06

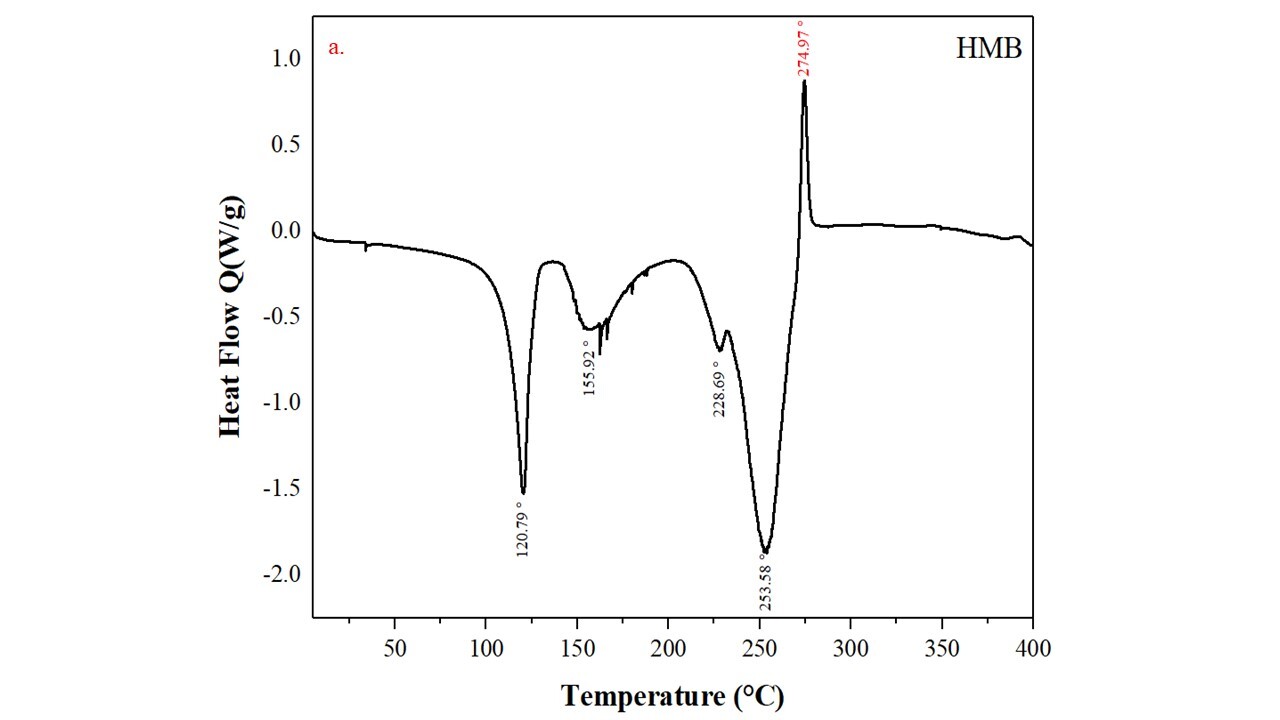


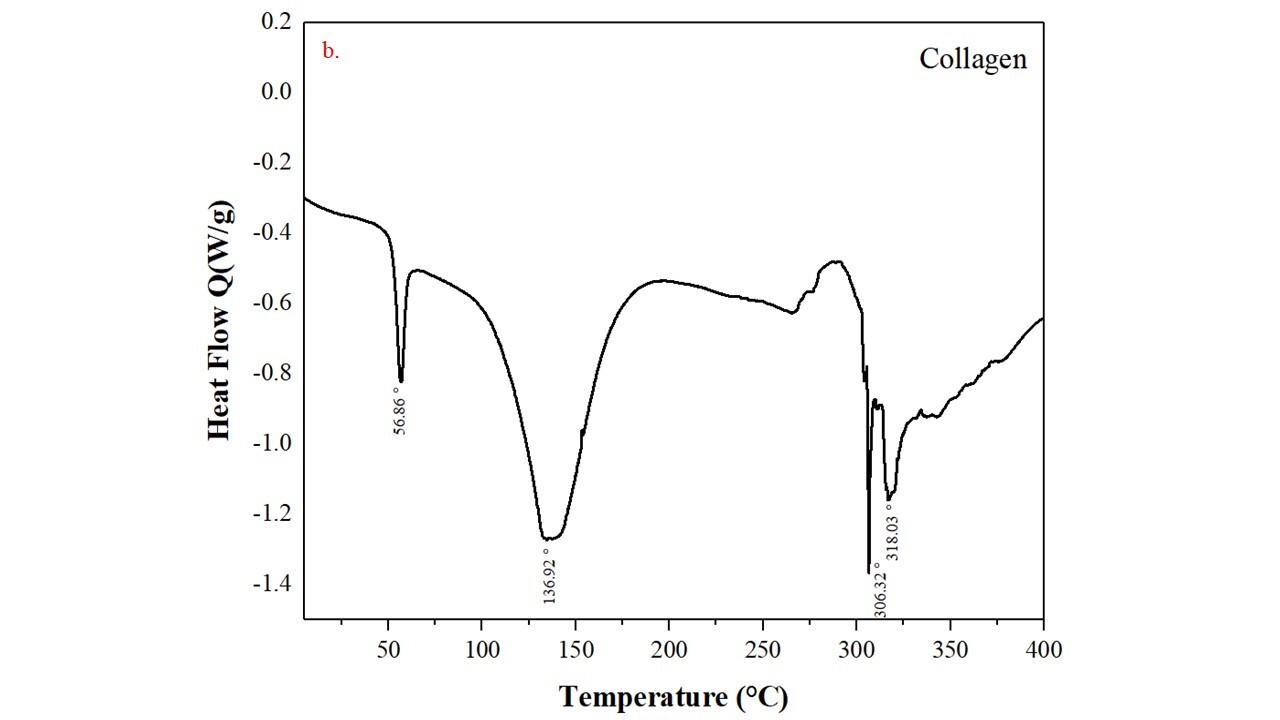


**Figure S2**. Differential Scanning Calorimetry thermogram of a) pure HMB, and b) collagen

Supplement: f2 [file 3060539.f2.docx]
